# Supplementary material
Source: PubMed Central journal article supplement (PMC5018613)
Supplement: JZUSB17-0657-TS1.pdf [file JZUSB17-0657-TS1.pdf]

**Table S1 Individual mouse data on NCD**

| Genotype                      | Mouse # | Week 4 (g) | Week 5 (g) | Week 6 (g) | Week 7 (g) | Week 8 (g) | Week 9 (g) | Week 10 (g) | Week 11 (g) | Week 12 (g) | Week 13 (g) | Week 14 (g) | Week 15 (g) | Week 16 (g) | Week 17 (g) | Week 18 (g) | Week 19 (g) | Week 20 (g) | EWAT weight (g) | TL (mm) |
|-------------------------------|---------|------------|------------|------------|------------|------------|------------|-------------|-------------|-------------|-------------|-------------|-------------|-------------|-------------|-------------|-------------|-------------|-----------------|---------|
| <i>Rps6kb1</i> <sup>-/-</sup> | #1      | 13.2       | 18.42      | 20.05      | 21.85      | 23         | 23.5       | 24.14       | 24.64       | 24.97       | 25.2        | 25.37       | 26.04       | 26.38       | 26.4        | 26.7        | 26.38       | 26.86       | 0.33            | 17.68   |
| <i>Rps6kb1</i> <sup>-/-</sup> | #2      | 12.96      | 18.46      | 19.56      | 20.87      | 21.49      | 22.64      | 23.23       | 23.76       | 24          | 24.25       | 24.52       | 25.24       | 25.36       | 26.15       | 26.44       | 26.38       | 26.39       | 0.55            | 17.44   |
| <i>Rps6kb1</i> <sup>-/-</sup> | #3      | 13.62      | 15.82      | 17.98      | 19.02      | 20.43      | 21.15      | 21.93       | 22.1        | 22.67       | 22.61       | 23.63       | 23.23       | 23.87       | 24.9        | 24.96       | 24.82       | 25.15       | 0.6             | 17.14   |
| <i>Rps6kb1</i> <sup>-/-</sup> | #4      | 12.9       | 16.62      | 18.3       | 19.67      | 20.7       | 20.5       | 20.05       | 21.51       | 21.48       | 22.29       | 23.58       | 23.45       | 23.77       | 24.5        | 24.65       | 26.55       | 27.85       | 0.68            | 17      |
| <i>Rps6kb1</i> <sup>-/-</sup> | #5      | 14.76      | 18.7       | 20.25      | 21.53      | 21.9       | 21.3       | 21.21       | 22.45       | 23.3        | 24.12       | 24.74       | 25.27       | 25.3        | 25.53       | 25.3        | 26.42       | 27.1        | 0.68            | 17.5    |
| <i>Rps6kb1</i> <sup>-/-</sup> | #6      | 12.37      | 16.02      | 16.9       | 18.04      | 19.22      | 19.99      | 20.51       | 21.17       | 22.05       | 22.4        | 22.62       | 23.38       | 23.95       | 24.03       | 24.28       | 25.31       | 26.18       | 0.57            | 17.22   |
| <i>Rps6kb1</i> <sup>-/-</sup> | #7      | 11.23      | 16.16      | 18.19      | 19.4       | 20.71      | 21.64      | 21.97       | 21.43       | 22.95       | 23.45       | 23.85       | 24.1        | 24.33       | 24.41       | 24.83       | 24.53       | 25.4        | 0.2             | 17.06   |
| <i>Rps6kb1</i> <sup>-/-</sup> | #8      | 11.75      | 16.57      | 18.68      | 19.67      | 21.05      | 22.29      | 22.54       | 21.84       | 23.31       | 23.31       | 24.2        | 24.24       | 24.8        | 25.49       | 25.83       | 24.97       | 25.18       | 0.21            | 17.1    |
| <i>Rps6kb1</i> <sup>-/-</sup> | #9      | 12.45      | 17.15      | 18.78      | 20.4       | 20.65      | 21.05      | 21.75       | 22.58       | 22.94       | 23.64       | 23.8        | 24.9        | 25.05       | 25.85       | 26.27       | 26.7        | 26.7        | 0.41            | 17.44   |
| <i>Rps6kb1</i> <sup>-/-</sup> | #10     | 14.44      | 19.08      | 20.25      | 21.44      | 21.42      | 22.18      | 23.09       | 23.5        | 23.55       | 23.9        | 25.25       | 25.68       | 26.14       | 26.45       | 26.9        | 27.65       | 28.38       | 0.84            | 17.62   |
| <i>Rps6kb1</i> <sup>-/-</sup> | #11     | 10.88      | 16.6       | 19.35      | 21         | 22.54      | 23.1       | 23.85       | 24.3        | 24.65       | 24.43       | 25.15       | 25.45       | 25.2        | 25.2        | 25.7        | 25.1        | 25.8        | 0.17            | 17.3    |
| WT                            | #1      | 15.9       | 20.86      | 23.94      | 25.58      | 27.23      | 28.8       | 29.45       | 29.75       | 31.2        | 31.43       | 32.74       | 32.45       | 32.65       | 32.68       | 34.57       | 34.75       | 34.55       | 0.82            | 18.54   |
| WT                            | #2      | 18.75      | 23.16      | 24.66      | 26.45      | 27.87      | 29.02      | 30.3        | 31.07       | 32.25       | 32.74       | 33.34       | 33.3        | 33.63       | 35.77       | 37          | 37.45       | 37.9        | 1.38            | 18.48   |
| WT                            | #3      | 14.39      | 18.09      | 20.4       | 22.3       | 23.95      | 24.35      | 25.5        | 25.85       | 26.08       | 25.86       | 26.85       | 27.37       | 28.34       | 28.67       | 29.35       | 28.4        | 29.5        | 0.7             | 18.1    |
| WT                            | #4      | 17.55      | 20.05      | 21.55      | 22.43      | 23.47      | 23.68      | 25.05       | 25.8        | 26.2        | 27.2        | 27.95       | 28.83       | 29.18       | 29.92       | 30.64       | 31.62       | 33.8        | 0.69            | 18.52   |
| WT                            | #5      | 17.14      | 21.3       | 23.59      | 25.17      | 26.93      | 27.02      | 27.75       | 28.04       | 28.75       | 28.69       | 29.58       | 30.03       | 30.2        | 30.1        | 30.95       | 31.3        | 31.1        | 0.36            | 18.42   |
| WT                            | #6      | 14.45      | 20.33      | 21.42      | 23.65      | 24.23      | 25.19      | 25.65       | 26.55       | 27.18       | 27.38       | 27.8        | 28.67       | 30.04       | 30.26       | 30.77       | 31.23       | 31.3        |                 |         |
| WT                            | #7      | 14.57      | 19.81      | 22.05      | 24.62      | 25.81      | 26.83      | 27.79       | 28.15       | 28.3        | 29.27       | 29.79       | 30.85       | 30.89       | 31.4        | 31.38       | 32.87       | 33.29       |                 |         |
| WT                            | #8      | 13.63      | 17.45      | 19.75      | 21.1       | 22.07      | 22.59      | 23.6        | 24.1        | 25.21       | 25.84       | 26.71       | 26.84       | 27.38       | 28.31       | 28.7        | 29.33       | 30.11       |                 |         |
| WT                            | #9      | 15.7       | 20.53      | 22.1       | 24.37      | 25.25      | 26.5       | 26.98       | 27.7        | 28.95       | 29.06       | 29.92       | 30.06       | 30.35       | 31.45       | 31.97       | 32.55       | 33.2        |                 |         |
| WT                            | #10     | 13.74      | 19.5       | 21.53      | 23.24      | 24.27      | 25.1       | 26.06       | 26.48       | 27.62       | 28.49       | 29.17       | 29.76       | 29.9        | 30.18       | 30.5        | 31.41       | 31.35       |                 |         |
| WT                            | #11     | 13.52      | 19.05      | 20.17      | 21.96      | 23.08      | 23.81      | 25.01       | 25.57       | 26.64       | 27.56       | 28.4        | 28.34       | 28.89       | 29.43       | 29.54       | 30.15       | 30.28       |                 |         |
| WT                            | #12     | 16.39      | 21.07      | 21.92      | 23.04      | 25.05      | 25.39      | 26.94       | 28          | 27.9        | 28.76       | 28.2        | 28.8        | 28.48       | 29.65       | 30.74       | 30.45       | 31.5        |                 |         |
| WT                            | #13     | 16.6       | 21.89      | 21.45      | 23.95      | 25.53      | 26.46      | 28.2        | 29.78       | 30.7        | 32.22       | 33.1        | 34.6        | 34.41       | 35.05       | 34.8        | 35.85       | 36.38       |                 |         |
| WT                            | #14     | 14.4       | 19.73      | 21.75      | 22.8       | 23.84      | 24.84      | 25.85       | 26.82       | 27.3        | 27.85       | 28.05       | 28.33       | 28.76       | 29.22       | 30.71       | 31.45       | 31.6        | 0.81            | 18.1    |
| WT                            | #15     | 16.15      | 20.47      | 22.02      | 23.64      | 24.42      | 25.37      | 26.25       | 26.89       | 27.11       | 27.78       | 27.94       | 28.05       | 29.23       | 29.6        | 30.4        | 31.3        | 30.85       | 0.89            | 18.28   |
| WT                            | #16     | 16.44      | 21.31      | 22.95      | 24.5       | 25.69      | 27.06      | 27.5        | 28.3        | 29.22       | 29.41       | 29.7        | 31.36       | 31.68       | 32.04       | 32.54       | 32.97       | 33.47       | 1.11            | 18.54   |
| WT                            | #17     | 15.16      | 20.8       | 20.98      | 23.38      | 24.3       | 25.75      | 26.65       | 27.95       | 28.69       | 28.95       | 29.26       | 30.85       | 30.99       | 32.02       | 32.05       | 32.55       | 33.17       | 1.18            | 18.42   |
| WT                            | #18     | 13.68      | 19.02      | 20.42      | 21.38      | 22.34      | 23.2       | 23.51       | 24.26       | 24.77       | 25          | 25.86       | 25.64       | 25.99       | 26.38       | 27.4        | 27.35       | 27.7        | 0.41            | 17.96   |
| WT                            | #19     | 16.66      | 21.7       | 23.25      | 25.25      | 26.87      | 28.45      | 29.9        | 30.8        | 31.77       | 32.48       | 33.03       | 33.73       | 34.6        | 34.62       | 34.91       | 35.6        | 36.4        | 1.38            | 18.5    |
| WT                            | #20     | 13.7       | 18.71      | 20.6       | 23.47      | 24.5       | 24.9       | 26.43       | 27.35       | 28.7        | 29.35       | 29.84       | 30.02       | 30.08       | 30.63       | 31.44       | 32.65       | 33.38       | 0.93            | 18.2    |
| WT                            | #21     | 16.89      | 22.06      | 23.47      | 24.7       | 26.23      | 27.25      | 28.5        | 29.48       | 30.76       | 30.22       | 31.21       | 30.95       | 32.45       | 33          | 34.3        | 34.43       | 35.1        | 1.12            | 18.5    |
| <i>Rcan2</i> <sup>-/-</sup>   | #1      | 13.83      | 19.23      | 20.82      | 22.32      | 24.76      | 24.93      | 25.26       | 25.9        | 26.62       | 27.41       | 27.16       | 28.03       | 29.24       | 29.41       | 30.37       | 30.62       | 30.25       |                 |         |
| <i>Rcan2</i> <sup>-/-</sup>   | #2      | 13.37      | 18.52      | 20.3       | 22.16      | 23.33      | 23.66      | 23.78       | 24.43       | 25.33       | 25.38       | 25.63       | 26.37       | 26.6        | 27.1        | 27.05       | 27.41       | 26.74       |                 |         |
| <i>Rcan2</i> <sup>-/-</sup>   | #3      | 14.08      | 19.49      | 21.17      | 22.45      | 23.47      | 24.48      | 25.47       | 26.17       | 27.09       | 27.17       | 27.58       | 27.4        | 27.91       | 28.47       | 27.87       | 28.8        | 28.6        |                 |         |
| <i>Rcan2</i> <sup>-/-</sup>   | #4      | 16.05      | 21.6       | 22.5       | 23.76      | 26.47      | 27.06      | 27.9        | 29.08       | 28.86       | 29.2        | 29.06       | 29.9        | 30.05       | 31.11       | 31.77       | 32.05       | 32.67       |                 |         |
| <i>Rcan2</i> <sup>-/-</sup>   | #5      | 12.53      | 18.56      | 20.2       | 21.93      | 23.16      | 24.04      | 25.19       | 26.13       | 26.66       | 27.1        | 26.75       | 27.59       | 28.4        | 28.34       | 29.15       | 29.93       | 29.6        |                 |         |
| <i>Rcan2</i> <sup>-/-</sup>   | #6      | 14.22      | 19.81      | 19.96      | 21.9       | 22.96      | 23.71      | 24.14       | 24.14       | 24.4        | 24.6        | 25.18       | 25.67       | 25.21       | 25.75       | 25.73       | 25.83       | 26.27       |                 |         |
| <i>Rcan2</i> <sup>-/-</sup>   | #7      | 16.17      | 20.52      | 22.96      | 24.32      | 25.4       | 26.06      | 27.31       | 28.03       | 27.7        | 27.65       | 27.71       | 28.02       | 28.04       | 29.8        | 30.44       | 30.97       | 30.77       | 0.86            | 18.16   |
| <i>Rcan2</i> <sup>-/-</sup>   | #8      | 14.07      | 21.63      | 22.12      | 24.01      | 24.5       | 24.89      | 25.36       | 25.6        | 25.83       | 25.57       | 25.74       | 26.6        | 27.3        | 26.89       | 26.97       | 27.4        | 27.86       | 0.52            | 18.22   |
| <i>Rcan2</i> <sup>-/-</sup>   | #9      | 15.35      | 21.07      | 22.84      | 23.97      | 25.01      | 25.45      | 25.9        | 26.74       | 27.23       | 27.17       | 27.45       | 27.72       | 28.35       | 28.52       | 28.35       | 28.8        | 29.33       | 0.49            | 18.26   |
| <i>Rcan2</i> <sup>-/-</sup>   | #10     | 16.18      | 21.22      | 22.2       | 22.99      | 24.52      | 24.8       | 25.25       | 25.55       | 25.82       | 25.8        | 26.2        | 26.35       | 27.02       | 27.27       | 27.71       | 28.2        | 28.95       | 0.44            | 18.18   |
| <i>Rcan2</i> <sup>-/-</sup>   | #11     | 14.59      | 19.73      | 21.5       | 23.07      | 24.26      | 24.21      | 25.03       | 26.08       | 26.96       | 26.6        | 27.05       | 27.35       | 27.15       | 27.54       | 28.4        | 28.95       | 29.78       | 0.52            | 18.28   |
| <i>Rcan2</i> <sup>-/-</sup>   | #12     | 13.05      | 18.49      | 20         | 20.59      | 22.59      | 23.03      | 23.8        | 24.05       | 24.45       | 24.87       | 25.2        | 25.6        | 26.02       | 26.65       | 26.83       | 26.58       | 26.65       | 0.4             | 18.1    |
| <i>Rcan2</i> <sup>-/-</sup>   | #13     | 11.7       | 16.21      | 20.2       | 21.41      | 23.28      | 24.06      | 25.97       | 25.64       | 25.95       | 26.46       | 26.8        | 27.25       | 27.54       | 27.8        | 27.98       | 28.1        | 28.35       | 0.34            | 18.18   |
