# Supplementary material
Source: PubMed Central journal article supplement (PMC5018613)
Supplement: JZUSB17-0657-TS2.pdf [file JZUSB17-0657-TS2.pdf]

**Table S2 Individual mouse data on HFD**

| Genotype                      | Mouse # | Week 4(g) | Week 5(g) | Week 6(g) | Week 7(g) | Week 8(g) | Week 9(g) | Week 10(g) | Week 11(g) | Week 12(g) | Week 13(g) | Week 14(g) | Week 15(g) | Week 16(g) | Week 17(g) | Week 18(g) | Week 19(g) | Week 20(g) | EWAT(g) | RWAT(g) | Liver(g) | TL(mm) |
|-------------------------------|---------|-----------|-----------|-----------|-----------|-----------|-----------|------------|------------|------------|------------|------------|------------|------------|------------|------------|------------|------------|---------|---------|----------|--------|
| <i>Rps6kb1</i> <sup>-/-</sup> | #1      | 14.75     | 19.23     | 19.7      | 21.95     | 22.84     | 24.35     | 25.85      | 27         | 27.45      | 28.45      | 29.95      | 30.7       | 32.02      | 33.35      | 35.1       | 37.05      | 38.75      | 3.25    | 0.99    | 1.29     | 16.92  |
| <i>Rps6kb1</i> <sup>-/-</sup> | #2      | 14.25     | 18.65     | 20.15     | 21.9      | 22.85     | 23.6      | 24.4       | 24.8       | 25.35      | 26.35      | 27.45      | 28.25      | 29.05      | 30.27      | 30.55      | 32.12      | 33         | 2.3     | 0.7     | 1.01     | 16.96  |
| <i>Rps6kb1</i> <sup>-/-</sup> | #3      | 13.76     | 17.3      | 18.1      | 19.4      | 20.35     | 20.9      | 21.15      | 21.9       | 22.55      | 23.35      | 23.95      | 25.12      | 26.15      | 27.35      | 27.6       | 27.95      | 28.6       |         |         |          |        |
| <i>Rps6kb1</i> <sup>-/-</sup> | #4      | 16.58     | 19.65     | 20.6      | 22.5      | 23.45     | 23.8      | 24.15      | 24.7       | 26.2       | 27         | 28.2       | 29.85      | 30.85      | 32.65      | 33.9       | 35.7       | 37.95      | 3.12    | 0.89    | 1.31     | 17.13  |
| <i>Rps6kb1</i> <sup>-/-</sup> | #5      | 11.7      | 16.6      | 17.8      | 19        | 20.5      | 21.2      | 22.35      | 24.05      | 25.2       | 26.25      | 27.5       | 28.8       | 30.4       | 31.72      | 32.5       | 33.5       | 35.5       | 2.64    | 1.02    | 1.21     | 16.72  |
| <i>Rps6kb1</i> <sup>-/-</sup> | #6      | 17.25     | 20        | 20.8      | 21.98     | 23.8      | 24.6      | 25.43      | 27.25      | 28.7       | 30.25      | 31.6       | 33.25      | 34.95      | 36.05      | 36.47      | 38.25      | 40.45      | 2.92    | 1.19    | 1.91     | 17.3   |
| <i>Rps6kb1</i> <sup>-/-</sup> | #7      | 12.4      | 17.45     | 18.8      | 20.75     | 21.7      | 22.2      | 23.75      | 24.4       | 25.1       | 26.1       | 27.75      | 28.6       | 29.75      | 30.15      | 29.85      | 30.5       | 30.9       | 1.54    | 0.61    | 1        | 17.14  |
| <i>Rps6kb1</i> <sup>-/-</sup> | #8      | 13.1      | 18.45     | 19.01     | 20.4      | 21.85     | 23.58     | 25.1       | 25.8       | 27.4       | 28.85      | 30.5       | 31.8       | 33         | 34.55      | 35.2       | 36.6       | 37.75      | 2.81    | 0.94    | 1.29     | 17.28  |
| <i>Rps6kb1</i> <sup>-/-</sup> | #9      | 12.45     | 17.25     | 18.7      | 20.35     | 21.65     | 22.8      | 23.75      | 25         | 25.85      | 27.3       | 28.9       | 30.8       | 31.58      | 32.48      | 33.65      | 35.37      | 37.15      | 2.63    | 0.97    | 1.4      | 16.96  |
| WT                            | #1      | 14.98     | 20.4      | 22.85     | 25.3      | 28        | 30.5      | 32.85      | 34.9       | 36.9       | 37.6       | 40.6       | 41.3       | 44.6       | 46.53      | 48.2       | 49.1       | 49.8       | 2.18    | 1.4     | 2.01     | 18.24  |
| WT                            | #2      | 15.5      | 20.85     | 22.6      | 24.8      | 27        | 29.01     | 31.35      | 33.45      | 34.4       | 35.9       | 37.45      | 40.45      | 43.35      | 44.97      | 46.48      | 47.35      | 48.65      | 2.05    | 1.47    | 1.8      | 18.42  |
| WT                            | #3      | 15.85     | 21.36     | 22.6      | 24.75     | 26.65     | 28.15     | 30         | 30.1       | 31.6       | 33.5       | 35.87      | 37.55      | 39.6       | 41.75      | 43.9       | 46.35      | 48.25      | 3.65    | 1.47    | 1.45     | 18.06  |
| WT                            | #4      | 15.85     | 19.75     | 21.2      | 23.2      | 24.6      | 26.95     | 29.25      | 30.47      | 32.4       | 34.5       | 36.9       | 39.1       | 41         | 42.95      | 43.95      | 45.4       | 47.05      | 2.28    | 1.4     | 1.82     | 18     |
| WT                            | #5      | 16.45     | 22.7      | 23.8      | 25.6      | 27.4      | 28.35     | 30.5       | 31         | 31.95      | 33.35      | 34.6       | 36.3       | 38.36      | 39.9       | 41.65      | 44.55      | 3.02       | 1.31    | 1.41    | 18.32    |        |
| WT                            | #6      | 16.65     | 20.65     | 23.1      | 24.7      | 27.2      | 29.25     | 31.7       | 33.85      | 34.5       | 36.45      | 37.55      | 38.2       | 39.45      | 40.5       | 42.2       | 42.8       | 44.1       | 2.74    | 1.29    | 1.29     | 18.28  |
| WT                            | #7      | 16.75     | 22.25     | 24.15     | 26.8      | 29.6      | 31.65     | 33.95      | 34.9       | 37.6       | 39.2       | 42.6       | 45.05      | 47.8       | 49.8       | 51.05      | 51.8       | 53         | 2.32    | 1.62    | 2.87     | 18.32  |
| WT                            | #8      | 17.2      | 21.75     | 23.9      | 25.45     | 27.2      | 28.65     | 30.7       | 33.06      | 35.3       | 37.75      | 40.01      | 41.85      | 44.58      | 46.95      | 48.8       | 49.1       | 49.9       | 2.41    | 2.2     | 2.27     | 18.3   |
| WT                            | #9      | 17.51     | 22.15     | 23.9      | 25.95     | 28.55     | 30.2      | 32.7       | 34.54      | 36.25      | 38.1       | 40.05      | 41.9       | 43.55      | 45.25      | 47.7       | 48.4       | 50.15      | 2.34    | 1.56    | 2.02     | 18.2   |
| WT                            | #10     | 18.25     | 22.45     | 24.6      | 26.65     | 28.35     | 29.85     | 31.6       | 32.28      | 33.95      | 34.55      | 36.63      | 38.55      | 39.8       | 40.5       | 41.4       | 42.12      | 43.9       | 2.72    | 1.22    | 1.31     | 18.26  |
| WT                            | #11     | 18.7      | 21.95     | 24.25     | 26.65     | 28.58     | 31.23     | 33.85      | 35.19      | 37.65      | 40.6       | 43.65      | 45.9       | 47.8       | 49.4       | 50.48      | 51.95      | 52.35      | 2.15    | 2.05    | 3.06     | 18.22  |
| WT                            | #12     | 19.92     | 24.1      | 26.85     | 28.9      | 31.35     | 33.2      | 35.85      | 38.35      | 40.2       | 42.05      | 43.25      | 43         | 45.2       | 47.55      | 49.4       | 50         | 51.28      | 2.4     | 1.48    | 1.91     | 18.6   |
| <i>Rcan2</i> <sup>-/-</sup>   | #1      | 13.7      | 19.3      | 21.55     | 22.9      | 23.6      | 24.9      | 25.5       | 26         | 26.75      | 27.05      | 26.6       | 27         | 27.8       | 28.4       | 28.27      | 29.45      | 29.68      | 0.97    | 0.51    | 0.93     | 18.02  |
| <i>Rcan2</i> <sup>-/-</sup>   | #2      | 14.4      | 19.65     | 21.95     | 23        | 25.15     | 25.8      | 27.4       | 28.75      | 30.2       | 31.6       | 33.05      | 33.75      | 36.35      | 37.65      | 39.25      | 40.5       | 42.35      |         |         |          |        |
| <i>Rcan2</i> <sup>-/-</sup>   | #3      | 14.53     | 20.15     | 21.45     | 22.95     | 24.1      | 24.8      | 25.4       | 26.3       | 26.1       | 26.7       | 26.75      | 27.5       | 28.3       | 28.95      | 29.4       | 29.8       | 30.63      | 1.33    | 0.57    | 0.89     | 18.08  |
| <i>Rcan2</i> <sup>-/-</sup>   | #4      | 14.88     | 19.95     | 22.8      | 24.45     | 26.5      | 28.15     | 30         | 31.8       | 32.35      | 33         | 33.1       | 33.85      | 34.6       | 35.25      | 35.95      | 35.7       | 36         | 1.66    | 0.75    | 1.1      | 18.06  |
| <i>Rcan2</i> <sup>-/-</sup>   | #5      | 15.56     | 19.63     | 21.9      | 23.3      | 24.2      | 25.05     | 26.35      | 27.25      | 25.55      | 27.2       | 27.05      | 27.44      | 28.1       | 28.25      | 27.9       | 28.05      | 28.4       | 0.61    | 0.27    | 0.89     | 18.26  |
| <i>Rcan2</i> <sup>-/-</sup>   | #6      | 16.14     | 20.4      | 22.9      | 24.65     | 26.4      | 27.55     | 28.3       | 29.5       | 30.5       | 31.1       | 31.4       | 32.45      | 32.9       | 33.1       | 33.25      | 33.9       | 34.15      | 1.3     | 0.6     | 1.06     | 18.24  |
| <i>Rcan2</i> <sup>-/-</sup>   | #7      | 16.2      | 21.33     | 22.75     | 24.05     | 25.25     | 26.55     | 28.1       | 29.35      | 31.15      | 32.05      | 32.83      | 34.19      | 35         | 36.3       | 38.9       | 40.3       | 41.85      |         |         |          |        |
| <i>Rcan2</i> <sup>-/-</sup>   | #8      | 16.25     | 20.9      | 21.5      | 22.95     | 24.35     | 25        | 26         | 26.7       | 26.74      | 27.65      | 28.45      | 28.75      | 29.2       | 29.3       | 30.15      | 31.35      | 32.2       | 1.45    | 0.59    | 1.01     | 18.32  |
| <i>Rcan2</i> <sup>-/-</sup>   | #9      | 17.48     | 21.55     | 22.65     | 23.95     | 25.15     | 25.98     | 26.95      | 27.95      | 27.55      | 28.4       | 29.75      | 30.35      | 30.45      | 30.33      | 31.3       | 32.25      | 32.7       | 1.05    | 0.54    | 1.14     | 18.26  |
| <i>Rcan2</i> <sup>-/-</sup>   | #10     | 18.05     | 21.8      | 24.1      | 25.05     | 25.95     | 26.77     | 27.8       | 28.7       | 30         | 30.35      | 31.52      | 32.3       | 32.85      | 34.16      | 34.4       | 35.62      | 36.5       | 1.46    | 0.77    | 1.12     | 18.4   |
| <i>Rcan2</i> <sup>-/-</sup>   | #11     | 19.15     | 22.95     | 23.9      | 25.14     | 26.3      | 27.98     | 28.05      | 28.95      | 31.04      | 32.1       | 32.82      | 34.4       | 35.7       | 36.8       | 38.3       | 39.3       | 40.2       |         |         |          |        |
