# Supplementary material
Source: PubMed Central journal article supplement (PMC5018613)
Supplement: JZUSB17-0657-TS3.pdf [file JZUSB17-0657-TS3.pdf]

**Table S3 Individual mouse data for pair-feeding**

| genotype                    | Mouse # | Week 4(g) | Week 5(g) | Week 6(g) | Week 7(g) | Week 8(g) | Week 9(g) | Week 10(g) | Week 11(g) | Week 12(g) | Week 13(g) | Week 14(g) | Week 15(g) | Week 16(g) | Week 17(g) | Week 18(g) | Week 19(g) | Week 20(g) | EWAT(g) | RWAT(g) | Liver(g) | TL(mm) |
|-----------------------------|---------|-----------|-----------|-----------|-----------|-----------|-----------|------------|------------|------------|------------|------------|------------|------------|------------|------------|------------|------------|---------|---------|----------|--------|
| <i>Rcan2</i> <sup>-/-</sup> | #1      | 13.7      | 18.9      | 20.5      | 22.22     | 23.1      | 23.13     | 24.4       | 25.35      | 26.05      | 27         | 27.3       | 27.5       | 28.15      | 29.05      | 29.75      | 30.75      | 31.6       | 1.34    | 0.73    | 1        | 18.02  |
| <i>Rcan2</i> <sup>-/-</sup> | #2      | 15        | 19.35     | 20.75     | 22.05     | 23.25     | 23.8      | 25.45      | 26.9       | 27.78      | 28.73      | 29.35      | 30.2       | 31.05      | 31.3       | 33.1       | 34.7       | 35.6       | 1.98    | 1.11    | 1.08     | 18.04  |
| <i>Rcan2</i> <sup>-/-</sup> | #3      | 15.15     | 19.9      | 21.5      | 23.25     | 24.2      | 24.9      | 25.75      | 27.03      | 27.53      | 28.5       | 28.65      | 29.35      | 29.6       | 30.4       | 31.2       | 31.55      | 32.8       | 1.47    | 0.78    | 1.23     | 18.12  |
| <i>Rcan2</i> <sup>-/-</sup> | #4      | 14.45     | 19.85     | 21.4      | 23.05     | 23.7      | 25.05     | 25.65      | 26.55      | 27.45      | 29.16      | 30         | 30.6       | 31.38      | 31.35      | 32.7       | 35         | 36.5       | 1.98    | 0.99    | 1.13     | 18.2   |
| WT                          | #1      | 15.25     | 20.9      | 21.5      | 22.6      | 23.6      | 24.3      | 25.9       | 26.1       | 27.35      | 28.8       | 29.35      | 29.85      | 29.75      | 29.45      | 30.2       | 31.85      | 32.95      | 1.79    | 0.86    | 1.04     | 18.06  |
| WT                          | #2      | 16        | 21.35     | 22.35     | 23.65     | 24.28     | 25.45     | 26.68      | 28.03      | 29.98      | 31.1       | 32.25      | 33.3       | 33.8       | 33.83      | 34.6       | 36.3       | 38.2       | 2.53    | 1.26    | 1.14     | 18.26  |
| WT                          | #3      | 15.05     | 21        | 22.2      | 24        | 24.85     | 25.3      | 27.25      | 26.8       | 27.9       | 28.75      | 29.9       | 29.6       | 29.74      | 30.3       | 30.65      | 31.95      | 32.75      | 1.83    | 0.8     | 1.03     | 18.14  |
| WT                          | #4      | 15.5      | 21.95     | 23.2      | 24.8      | 25.65     | 26.45     | 28.1       | 28.65      | 30.25      | 30.9       | 31.15      | 31.3       | 32.1       | 32.8       | 33.1       | 34.05      | 34.5       | 2.04    | 0.89    | 1.01     | 18.04  |
