# Supplementary material
Source: PubMed Central journal article supplement (PMC5018613)
Supplement: JZUSB17-0657-TS4.pdf [file JZUSB17-0657-TS4.pdf]

**Table S4 Individual mouse data for double-mutants**

| Genotype                                                  | Mouse # | Week 4(g) | Week 5(g) | Week 6(g) | Week 7(g) | Week 8(g) | Week 9(g) | Week 10(g) | Week 11(g) | Week 12(g) | Week 13(g) | Week 14(g) | Week 15(g) | Week 16(g) | Week 17(g) | Week 18(g) | Week 19(g) | Week 20(g) | EWAT(g) | RWAT(g) | Liver(g) | TL(mm) |
|-----------------------------------------------------------|---------|-----------|-----------|-----------|-----------|-----------|-----------|------------|------------|------------|------------|------------|------------|------------|------------|------------|------------|------------|---------|---------|----------|--------|
| <i>Rps6kb1</i> <sup>-/-</sup> <i>Rcan2</i> <sup>-/-</sup> | #1      | 8.61      | 14.4      | 17.1      | 18        | 19.25     | 19.55     | 20.07      | 20.45      | 20.7       | 21.1       | 21.27      | 21.8       | 21.88      | 22.1       | 21.85      | 22.2       | 22.46      | 0.2     | 0.05    | 0.97     | 16.6   |
| <i>Rps6kb1</i> <sup>-/-</sup> <i>Rcan2</i> <sup>-/-</sup> | #2      | 8.88      | 14.6      | 17.1      | 18.85     | 20.2      | 20.85     | 21.3       | 21.75      | 22.05      | 22.1       | 22.41      | 22.55      | 22.7       | 22.75      | 22.95      | 23.2       | 23.2       | 0.17    | 0.04    | 1.03     | 16.5   |
| <i>Rps6kb1</i> <sup>-/-</sup> <i>Rcan2</i> <sup>-/-</sup> | #3      | 11.75     | 17.3      | 18.85     | 19.65     | 20.7      | 20.98     | 21.07      | 21.85      | 21.85      | 22.45      | 22.55      | 22.1       | 22.95      | 23.38      | 23.35      | 23.38      | 23.98      | 0.28    | 0.11    | 0.99     | 17.28  |
| <i>Rps6kb1</i> <sup>-/-</sup> <i>Rcan2</i> <sup>-/-</sup> | #4      | 13.7      | 18.35     | 19.1      | 19.75     | 20.95     | 21.55     | 22.15      | 23.14      | 23.2       | 23.7       | 23.95      | 24.2       | 24.85      | 24.65      | 24.8       | 24.85      | 25         | 0.25    | 0.06    | 0.95     | 17.3   |
| <i>Rps6kb1</i> <sup>-/-</sup> <i>Rcan2</i> <sup>-/-</sup> | #5      | 15.5      | 18.9      | 20.15     | 21.15     | 22.05     | 22.2      | 22.7       | 23.4       | 24.08      | 23.95      | 24.6       | 24.3       | 24.29      | 24.15      | 24.5       | 24.6       | 24.5       | 0.23    | 0.07    | 1.13     | 17.3   |
| <i>Rps6kb1</i> <sup>-/-</sup> <i>Rcan2</i> <sup>-/-</sup> | #6      | 11.13     | 17.1      | 19.1      | 19.9      | 20.6      | 21.5      | 22.3       | 22.7       | 23.35      | 24.05      | 24.28      | 24.85      | 24.65      | 24.85      | 25.25      | 25.4       | 25.35      | 0.21    | 0.06    | 0.97     | 17.28  |
| <i>Rps6kb1</i> <sup>-/-</sup> <i>Rcan2</i> <sup>-/-</sup> | #7      | 12.4      | 17.8      | 19.3      | 21.35     | 22.45     | 23.5      | 23.95      | 24.65      | 24.35      | 25.34      | 25.45      | 25.55      | 26.1       | 25.7       | 25.5       | 25.1       | 25.85      | 0.26    | 0.08    | 1.08     | 17.32  |
| <i>Rps6kb1</i> <sup>-/-</sup> <i>Rcan2</i> <sup>-/-</sup> | #8      | 12.7      | 18.5      | 19.95     | 21.4      | 22.75     | 23.3      | 23.9       | 24.15      | 24.48      | 25         | 26.12      | 25.8       | 26.3       | 25.85      | 26.1       | 26.2       | 26.65      | 0.43    | 0.13    | 1.19     | 17.44  |
| <i>Rps6kb1</i> <sup>-/-</sup>                             | #1      | 15.75     | 19.8      | 20.85     | 21.8      | 22.85     | 23.5      | 24.4       | 25.6       | 25.44      | 26.7       | 27.05      | 27.35      | 27.75      | 27.96      | 28.8       | 29.02      | 29.37      | 0.76    | 0.33    | 1.22     | 17.62  |
| <i>Rps6kb1</i> <sup>-/-</sup>                             | #2      | 11.85     | 16.85     | 18.5      | 20.65     | 21.8      | 22.05     | 22.9       | 23.8       | 23.6       | 23.8       | 24.25      | 24.55      | 24.5       | 24.9       | 25.5       | 25.86      | 26.3       | 0.48    | 0.19    | 1.15     | 16.96  |
| <i>Rps6kb1</i> <sup>-/-</sup>                             | #3      | 15.9      | 19.05     | 21        | 21.4      | 22.2      | 22.55     | 22.6       | 23.5       | 24.16      | 24.35      | 25.05      | 25.35      | 25.3       | 26.05      | 26.65      | 26.97      | 27         | 0.72    | 0.31    | 0.98     | 17.26  |
| <i>Rps6kb1</i> <sup>-/-</sup>                             | #4      | 14.8      | 19.35     | 21.4      | 22.6      | 23.5      | 24.4      | 25.01      | 25.49      | 25.75      | 26.26      | 26.4       | 26.75      | 26.5       | 26.45      | 26.55      | 26.7       | 27.15      | 0.39    | 0.18    | 1.17     | 17.36  |
| <i>Rps6kb1</i> <sup>-/-</sup>                             | #5      | 13.85     | 18.8      | 19.65     | 20.75     | 21.55     | 22.6      | 22.45      | 23.15      | 22.9       | 23.65      | 24.38      | 25.15      | 25.57      | 25.45      | 25.98      | 27.05      | 27.25      | 0.8     | 0.37    | 1.09     | 17.28  |
| <i>Rps6kb1</i> <sup>-/-</sup>                             | #6      | 14.85     | 18.26     | 20.6      | 21.75     | 22.9      | 23.8      | 24.95      | 24.94      | 25.65      | 25.88      | 26.15      | 26.55      | 27.25      | 27.5       | 27.13      | 27.4       | 27.55      | 0.28    | 0.1     | 1.39     | 17.64  |
| <i>Rps6kb1</i> <sup>-/-</sup>                             | #7      | 13.25     | 18.15     | 19.35     | 20.4      | 21.73     | 22.25     | 23.45      | 23.87      | 24.15      | 24.3       | 24.8       | 25.75      | 26         | 26.7       | 27.35      | 27.7       | 28.75      | 0.95    | 0.36    | 1.23     | 17.32  |
| <i>Rps6kb1</i> <sup>-/-</sup>                             | #8      | 13.3      | 18.9      | 20.4      | 21.6      | 22.6      | 22.93     | 23.9       | 24.12      | 24.45      | 25.5       | 25.9       | 26.4       | 26.45      | 27.9       | 27.7       | 28.64      | 29.65      | 1.1     | 0.4     | 1.27     | 17.26  |
